# Supplementary material for: Transtubular potassium gradient predicts kidney function impairment after adrenalectomy in primary aldosteronism
Source: PubMed Central journal article supplement — Ther Adv Chronic Dis. 2020 Aug 27;11:2040622320944792. doi: 10.1177/2040622320944792 (PMC7457632; doi:10.1177/2040622320944792), 2020-08-27
Supplement: Supplementary_Materials_TAJ-20-02-OA-032.R1_1.pdf [file Supplementary_Materials_TAJ-20-02-OA-032.R1_1.pdf]

Supplemental Materials

**Table S1.** Baseline characteristics (including anti-hypertension drugs) assessed to predict eGFR < 60 mL/min/1.73m<sup>2</sup> after 12 months of adrenalectomy by univariate and multivariate logistic regression analysis.

|                                           | Univariate            |         | Multivariate          |         |
|-------------------------------------------|-----------------------|---------|-----------------------|---------|
|                                           | Odds ratio (95% C.I.) | P value | Odds ratio (95% C.I.) | P value |
| Age (year)                                | 1.06 (1.03 - 1.09)    | < 0.001 |                       |         |
| Gender (Male)                             | 0.34 (0.19 - 0.58)    | < 0.001 |                       |         |
| Body weight (kg)                          | 1.02 (1.01 - 1.04)    | 0.012   |                       |         |
| BMI (kg/m <sup>2</sup> )                  | 1.07 (1.01 - 1.15)    | 0.032   |                       |         |
| SBP (mmHg)                                | 1.04 (1.02 - 1.05)    | < 0.001 | 1.06 (1.02 - 1.11)    | 0.001   |
| DBP (mmHg)                                | 1.02 (1.00 - 1.04)    | 0.014   |                       |         |
| eGFR (EPI-Cr, mL/min/1.73m <sup>2</sup> ) | 0.93 (0.91 - 0.94)    | < 0.001 | 0.91 (0.88 - 0.95)    | < 0.001 |
| Log aldosterone                           | 4.27 (1.55 - 11.81)   | 0.005   |                       |         |
| Plasma renin activity (ng/mL/hr)          | 1.26 (1.02 - 1.55)    | 0.031   |                       |         |
| Log Aldosterone renin ratio               | 0.52 (0.32 - 0.84)    | 0.007   |                       |         |
| Potassium (mEq/L)                         | 0.66 (0.44 - 1.00)    | 0.049   |                       |         |
| TTKG ≥ 4.9 (n = 217)                      | 2.10 (0.97 - 4.53)    | 0.059   | 6.43 (1.71 - 24.15)   | 0.006   |
| ACEI or ARB                               | 2.38 (1.39 - 4.13)    | 0.002   |                       |         |
| α-blocker                                 | 1.97 (1.10 - 3.51)    | 0.022   |                       |         |
| β-blocker                                 | 1.43 (0.84 - 2.44)    | 0.185   |                       |         |
| CCB                                       | 1.79 (0.96 - 3.36)    | 0.069   |                       |         |
| Vasodilator                               | 1.88 (0.68 - 5.21)    | 0.233   |                       |         |
| Diuretics                                 | 3.01 (1.46 - 6.22)    | 0.003   |                       |         |

Abbreviations: ACEI: angiotensin converting enzyme inhibitors; ARB: angiotensin receptor blockers; CCB: calcium channel blocker; BMI: body mass index; DBP: diastolic blood pressure; eGFR: estimated glomerular filtration rate; SBP: systolic blood pressure; TTKG: transtubular potassium gradient

**Table S2.** Factors predicting pre-operative TTKG  $\geq$  4.9 by logistic regression analysis

|                                           | Univariate            |         | Multivariate          |         |
|-------------------------------------------|-----------------------|---------|-----------------------|---------|
|                                           | Odds ratio (95% C.I.) | P value | Odds ratio (95% C.I.) | P value |
| Age (year)                                | 1.00 (0.98 – 1.03)    | 0.952   |                       |         |
| Gender (Male)                             | 1.89 (1.07 – 3.02)    | 0.027   |                       |         |
| Body weight (kg)                          | 0.97 (0.95 – 0.99)    | 0.006   |                       |         |
| BMI (kg/m <sup>2</sup> )                  | 0.92 (0.86 – 0.99)    | 0.024   |                       |         |
| SBP (mmHg)                                | 1.00 (0.98 – 1.01)    | 0.891   |                       |         |
| DBP (mmHg)                                | 0.99 (0.97 – 1.01)    | 0.486   |                       |         |
| eGFR (EPI-Cr, mL/min/1.73m <sup>2</sup> ) | 1.00 (0.99 – 1.02)    | 0.715   |                       |         |
| Log aldosterone                           | 8.34 (2.54 – 27.49)   | < 0.001 | 5.93 (1.56 – 22.50)   | 0.009   |
| Plasma renin activity (ng/mL/hr)          | 0.97 (0.89 – 1.06)    | 0.523   |                       |         |
| Log aldosterone renin ratio               | 0.86 (0.56 – 1.36)    | 0.553   |                       |         |
| Potassium (mEq/L)                         | 0.37 (0.22 – 0.60)    | < 0.001 | 0.33 (0.19- 0.59)     | < 0.001 |

Abbreviations: BMI: body mass index; DBP: diastolic blood pressure; eGFR: estimated glomerular filtration rate; SBP: systolic blood pressure; TTKG: transtubular potassium gradient

**Table S3.** The comparison of variables between TTKG  $\geq$  4.9 and TTKG  $<$  4.9 individuals.

|                                                          | TTKG $\geq$ 4.9     | TTKG $<$ 4.9        | P value    |
|----------------------------------------------------------|---------------------|---------------------|------------|
| Number of participant                                    | 141                 | 76                  |            |
| Age (years old)                                          | 50.5 $\pm$ 11.2     | 50.4 $\pm$ 11.5     | 0.953      |
| Sex, Female (%)                                          | 87 (61.7%)          | 35 (46.1%)          | 0.027*     |
| Body weight (kg)                                         | 66.79 $\pm$ 14.2    | 72.6 $\pm$ 14.7     | 0.005*     |
| BMI (kg/m <sup>2</sup> )                                 | 25.1 $\pm$ 4.0      | 26.4 $\pm$ 3.9      | 0.022*     |
| Hypertension duration (years)                            | 8.3 $\pm$ 7.3       | 6.6 $\pm$ 6.4       | 0.088      |
| SBP (mmHg)                                               | 154.3 $\pm$ 19.9    | 154.9 $\pm$ 20.0    | 0.820      |
| SBP 12 month (mmHg)                                      | 132.9 $\pm$ 17.1    | 137.9 $\pm$ 17.7    | 0.051      |
| DBP (mmHg)                                               | 91.3 $\pm$ 12.9     | 92.6 $\pm$ 14.0     | 0.488      |
| DBP 12 month (mmHg)                                      | 82.2 $\pm$ 10.8     | 85.9 $\pm$ 12.2     | 0.030*     |
| Plasma aldosterone level (ng/dL)                         | 64.83 $\pm$ 42.74   | 45.56 $\pm$ 24.27   | $<$ 0.001* |
| Plasma renin activity (ng/mL/hr)                         | 0.66 $\pm$ 2.17     | 0.96 $\pm$ 4.60     | 0.510      |
| Aldosterone renin ratio                                  | 1537.4 $\pm$ 3277.2 | 778.6 $\pm$ 1791.9  | 0.063      |
| Serum creatinine level (mg/dL)                           | 0.85 $\pm$ 0.26     | 0.88 $\pm$ 0.23     | 0.361      |
| Serum creatinine level 12 month (mg/dL)                  | 0.71 $\pm$ 0.35     | 1.01 $\pm$ 0.30     | 0.440      |
| Serum potassium level (mEq/L)                            | 3.39 $\pm$ 0.64     | 3.77 $\pm$ 0.56     | $<$ 0.001* |
| Serum potassium level 12 month (mEq/L)                   | 4.33 $\pm$ 0.47     | 4.30 $\pm$ 0.40     | 0.625      |
| eGFR (EPICr) before operation                            | 91.4 $\pm$ 20.5 #   | 90.4 $\pm$ 18.0 #   | 0.716      |
| eGFR (EPICr) 12 month                                    | 79.1 $\pm$ 23.2 #   | 83.8 $\pm$ 20.4 #   | 0.142      |
| The difference of eGFR before and after operation        | 12.3 $\pm$ 14.9     | 6.7 $\pm$ 15.2      | 0.008*     |
| Urinary ACR before operation                             | 89.0 $\pm$ 231.5 &  | 86.9 $\pm$ 312.8 \$ | 0.966      |
| Urinary ACR 12 month                                     | 24.8 $\pm$ 46.5 &   | 37.1 $\pm$ 77.2 \$  | 0.117      |
| The difference of urinary ACR before and after operation | 64.1 $\pm$ 213.2    | 49.8 $\pm$ 302.7    | 0.743      |

Abbreviations: ACR: albumin to creatinine ratio; BMI: body mass index; DBP: diastolic blood pressure; eGFR: estimated glomerular filtration rate; SBP: systolic blood pressure; TTKG: transtubular potassium

gradient

The variables compared between  $TTKG \geq 4.9$  and  $TTKG < 4.9$  groups was analyzed by independent t-test. \* P value  $< 0.05$  regarded as significant difference.

# represented  $p < 0.001$  when comparing EPI Cr before and after operation in  $TTKG \geq 4.9$  group and  $TTKG < 4.9$  group, respectively. Statistical analysis was conducted by compare t-test.

& represented  $p = 0.006$  when comparing urinary ACR before and after operation in  $TTKG \geq 4.9$  group. Statistical analysis was conducted by compare t-test was conducted.

\$ represented  $p = 0.236$  when comparing urinary ACR before and after operation in  $TTKG < 4.9$  group. Statistical analysis was conducted by compare t-test.

**Table S4.** The association between percentage of eGFR decrease and variables by linear regression analysis

|                                           | Univariate    |         | Multivariate  |         |
|-------------------------------------------|---------------|---------|---------------|---------|
|                                           | B Coefficient | P value | B Coefficient | P value |
| Age (year)                                | 0.06          | 0.549   | 0.38          | 0.004   |
| Gender (Male)                             | -7.97         | < 0.001 | -9.62         | 0.008   |
| Body weight (kg)                          | 0.14          | 0.063   |               |         |
| BMI (kg/m <sup>2</sup> )                  | 0.33          | 0.233   |               |         |
| SBP (mmHg)                                | 0.23          | < 0.001 | 0.33          | < 0.001 |
| DBP (mmHg)                                | 0.16          | 0.050   |               |         |
| eGFR (EPI-Cr, mL/min/1.73m <sup>2</sup> ) | 0.13          | 0.019   | 0.21          | 0.002   |
| Log aldosterone                           | 8.03          | 0.051   | 9.62          | 0.036   |
| Plasma renin activity (ng/mL/hr)          | -0.19         | 0.640   |               |         |
| Log Aldosterone renin ratio               | -3.30         | 0.058   |               |         |
| Potassium (mEq/L)                         | -6.58         | < 0.001 |               |         |
| TTKG $\geq$ 4.9                           | 6.58          | 0.010   | 7.06          | 0.005   |

Abbreviations: BMI: body mass index; DBP: diastolic blood pressure; eGFR: estimated glomerular filtration rate; SBP: systolic blood pressure; TTKG: transtubular potassium gradient

**Table S5.** Baseline Characteristics predicting 20 % decrease of eGFR after adrenalectomy by logistic regression analysis

|                                           | Univariate            |         | Multivariate          |         |
|-------------------------------------------|-----------------------|---------|-----------------------|---------|
|                                           | Odds ratio (95% C.I.) | P value | Odds ratio (95% C.I.) | P value |
| Age (year)                                | 1.02 (0.99 – 1.04)    | 0.150   |                       |         |
| Gender (Male)                             | 0.38 (0.23 – 0.63)    | < 0.001 | 0.16 (0.05 – 0.52)    | 0.002   |
| Body weight (kg)                          | 1.01 (0.99 – 1.03)    | 0.112   |                       |         |
| BMI (kg/m <sup>2</sup> )                  | 1.03 (0.97 – 1.09)    | 0.393   |                       |         |
| SBP (mmHg)                                | 1.02 (1.00 – 1.03)    | 0.007   | 1.04 (1.02 – 1.07)    | 0.001   |
| DBP (mmHg)                                | 1.01 (0.99 – 1.03)    | 0.180   | 0.96 (0.93 – 0.99)    | 0.042   |
| eGFR (EPI-Cr, mL/min/1.73m <sup>2</sup> ) | 0.99 (0.98 – 1.00)    | 0.171   |                       |         |
| Log aldosterone                           | 1.98 (0.80 – 4.88)    | 0.139   |                       |         |
| Plasma renin activity (ng/mL/hr)          | 0.98 (0.87 – 1.09)    | 0.722   |                       |         |
| Log aldosterone renin ratio               | 0.76 (0.51 – 1.14)    | 0.184   |                       |         |
| Potassium (mEq/L)                         | 0.61 (0.42 – 0.89)    | 0.010   |                       |         |
| TTKG ≥ 4.9                                | 2.03 (1.05 – 3.95)    | 0.036   | 2.55 (1.11 – 5.88)    | 0.028   |

Abbreviations: BMI: body mass index; DBP: diastolic blood pressure; eGFR: estimated glomerular filtration rate; SBP: systolic blood pressure; TTKG: transtubular potassium gradient

**Table S6.** The prediction of TTKG  $\geq$  4.9 to clinical outcome (success group vs absent success group) after adrenalectomy.

|                                           | Univariate            |         | Multivariate (Backward conditional) |         |
|-------------------------------------------|-----------------------|---------|-------------------------------------|---------|
|                                           | Odds ratio (95% C.I.) | P value | Odds ratio (95% C.I.)               | P value |
| Age (year)                                | 0.99 (0.96 – 1.02)    | 0.454   |                                     |         |
| Gender (Male)                             | 1.45 (0.76 – 2.76)    | 0.262   |                                     |         |
| Body weight (kg)                          | 0.98 (0.96 – 1.00)    | 0.027   |                                     |         |
| BMI (kg/m <sup>2</sup> )                  | 0.91 (0.85 – 0.98)    | 0.015   |                                     |         |
| SBP (mmHg)                                | 1.01 (0.99 – 1.03)    | 0.146   |                                     |         |
| DBP (mmHg)                                | 1.03 (0.99 – 1.04)    | 0.296   |                                     |         |
| eGFR (EPI-Cr, mL/min/1.73m <sup>2</sup> ) | 1.00 (0.99 – 1.02)    | 0.717   |                                     |         |
| Log aldosterone                           | 2.54 (0.74 – 8.72)    | 0.137   |                                     |         |
| Plasma renin activity (ng/mL/hr)          | 0.98 (0.89 – 1.08)    | 0.664   |                                     |         |
| Log aldosterone renin ratio               | 1.01 (0.63 – 1.62)    | 0.956   | 0.37 (0.20 – 0.69)                  | 0.002   |
| Potassium (mEq/L)                         | 0.56 (0.38 – 0.92)    | 0.023   |                                     |         |
| TTKG $\geq$ 4.9                           | 2.94 (1.27 – 6.78)    | 0.012   | 2.90 (1.21 – 6.92)                  | 0.017   |

The multivariate regression analysis was conducted by full adjustment of variables

Abbreviations: BMI: body mass index; DBP: diastolic blood pressure; eGFR: estimated glomerular filtration rate; SBP: systolic blood pressure; TTKG: transtubular potassium gradient
